# Supplementary material for: A test of the pioneer factor hypothesis using ectopic liver gene activation
Source: eLife. 2022 Jan 5;11:e73358. doi: 10.7554/eLife.73358 (PMC8849321; doi:10.7554/eLife.73358)
Supplement: Supplementary file 1. — Gene ontology terms, representative genes, and FDR values for liver-specific genes activated by FOXA1. [file elife-73358-supp1.xlsx]

## Sheet: Sheet1
FOXA1 overrepresented biological process	Representative genes	FDR
Fibrinolysis	SERPINF2, SERPING1, FGB, FGG, F2	9.48e-07
Negative regulation of complement activation	SERPINF2, VTN, F2	0.0436
Regulation of heterotypic cell-cell adhesion	APOA1, FGB, FGG	0.00624
Acute phase response	ITIH4, F2, SERPINF2	0.000575
Platelet degranulation	ALB, FGB, FGG, SERPINF2	4e-06
