# Supplementary material for: A test of the pioneer factor hypothesis using ectopic liver gene activation
Source: eLife. 2022 Jan 5;11:e73358. doi: 10.7554/eLife.73358 (PMC8849321; doi:10.7554/eLife.73358)
Supplement: Supplementary file 2. — Gene ontology terms, representative genes, and FDR values for liver-specific genes activated by HNF4A. [file elife-73358-supp2.xlsx]

## Sheet: Sheet1
HNF4A overrepresented biological process	Representative genes	FDR
Negative regulation of cholesterol import	APOC3, APOA2	0.00592
Negative regulation of VLDL particle remodeling/clearance	APOA1, APOC3, APOA2	0.000197
Chylomicron assembly/remodeling	APOC2, APOC3, APOA1, APOA2	2.22e-05
Tyrosine catabolic process	HGD, HPD	0.0161
Phospholipid efflux	APOC2, APOC3, APOA1, APOA2	4.14e-05
