# Supplementary material for: A test of the pioneer factor hypothesis using ectopic liver gene activation
Source: eLife. 2022 Jan 5;11:e73358. doi: 10.7554/eLife.73358 (PMC8849321; doi:10.7554/eLife.73358)
Supplement: Supplementary file 3. — Primer sequences used for plasmid construction and qPCR analysis. [file elife-73358-supp3.xlsx]

## Sheet: Sheet1
Name	Sequence
foxa1-v5-step1-R	agagggttagggataggcttaccacttgtattcaaaactggtcg
hnf4a-v5-step1-R	agagggttagggataggcttaccagcaacttgcccaaagcggc
v5-step2-F	ctacgtagaatcgagaccgaggagagggttagggataggctt
foxa1-pinducer-F	ccagcctccgcggccccgaaatgttgggcaccgtgaag
foxa1-pinducer-R	tgggacgtcgtatgggtattctacgtagaatcgagaccg
hnf4a-pinducer-F	ccagcctccgcggccccgaaatgcgactctccaaaacc
hnf4a-pinducer-R	tgggacgtcgtatgggtattctacgtagaatcgagacc
foxa1-qpcr-F	catgagacaagcgactggaa
foxa1-qpcr-R	tattaaaggaggccggtgtc
alb-qpcr-F	ctgcctgcctgttgccaaagc
alb-qpcr-R	ggcaaggtccgccctgtcatc
hnf4a-qpcr-F	aatgacacgtccccatcaga
hnf4a-qpcr-R	ggagtacatgtggttcttcc
apob-qpcr-F	agaggacagagccttggtggat
apob-qpcr-R	ctggacaaggtcatactctgcc
hprt-qpcr-F	tgacactggcaaaacaatgca
hprt-qpcr-R	ggtccttttcaccagcaagct
