# Supplementary material for: A test of the pioneer factor hypothesis using ectopic liver gene activation
Source: eLife. 2022 Jan 5;11:e73358. doi: 10.7554/eLife.73358 (PMC8849321; doi:10.7554/eLife.73358)
Supplement: Supplementary file 4. — Sequencing statistics for each ATAC-sequencing run, including the read length, read count, peak count, and Fraction of Reads in Peaks (FRiP). [file elife-73358-supp4.xlsx]

## Sheet: Sheet1
TF	Treatment	Replicate	Run Type	# Reads	# Peaks	FRIP
FOXA1	-dox	1	2x75	44743030	95990	0.314
FOXA1	-dox	2	2x75	52055353	95990	0.282
FOXA1	+dox	1	2x75	48185142	109307	0.243
FOXA1	+dox	2	2x75	54274296	109307	0.233
HNF4A	-dox	1	2x75	54010114	101013	0.361
HNF4A	-dox	2	2x75	66516188	101013	0.319
HNF4A	+dox	1	2x75	89510323	137042	0.326
HNF4A	+dox	2	2x75	79799450	137042	0.329
FOXA1-HNF4A	-dox	1	2x75	93547030	43269	0.252
FOXA1-HNF4A	-dox	2	2x75	116103754	43269	0.277
FOXA1-HNF4A	+dox	1	2x75	110957971	66716	0.34
FOXA1-HNF4A	+dox	2	2x75	101240257	66716	0.341
