# Supplementary material for: A test of the pioneer factor hypothesis using ectopic liver gene activation
Source: eLife. 2022 Jan 5;11:e73358. doi: 10.7554/eLife.73358 (PMC8849321; doi:10.7554/eLife.73358)
Supplement: Supplementary file 5. — Sequencing statistics for each CUT&Tag run, including the read length, read count, peak count, and Fraction of Reads in Peaks (FRiP). [file elife-73358-supp5.xlsx]

## Sheet: Sheet1
TF	Treatment	Antibody	Replicate	Run Type	# Reads	# Peaks	FRIP
FOXA1	+dox	FOXA1	1	2x150	19489387	42734	0.369
FOXA1	+dox	FOXA1	2	2x150	23025631	51994	0.377
HNF4A	+dox	HNF4A	1	2x150	15154729	37233	0.331
HNF4A	+dox	HNF4A	2	2x150	15615127	31864	0.269
FOXA1-HNF4A	+dox	FOXA1	1	2x150	22946339	33819	0.386
FOXA1-HNF4A	+dox	FOXA1	2	2x150	22739194	34145	0.37
FOXA1-HNF4A	+dox	HNF4A	1	2x150	18242414	41187	0.313
FOXA1-HNF4A	+dox	HNF4A	2	2x150	16269780	26193	0.222
FOXA1	+0.05dox	FOXA1	1	2x150	46090492	6039	0.095
FOXA1	+0.05dox	FOXA1	2	2x150	24625780	3218	0.075
HNF4A	+0.05dox	HNF4A	1	2x150	43839229	14301	0.109
HNF4A	+0.05dox	HNF4A	2	2x150	44493248	13552	0.109
